# Supplementary material for: Sub-5 nm monolayer germanium selenide (GeSe) MOSFETs: towards a high performance and stable device
Source: Royal Society of Chemistry journal article supplement (doi:10.1039/d0nr02170a), 2020-01-01
Supplement: d0nr02170a1.pdf [file d0nr02170a1.pdf]

## Supplementary Material

### **Sub-5 nm Monolayer Germanium Selenide (GeSe) MOSFETs: towards High Performance and Stable Device**

Ying Guo<sup>1,2\*</sup>, Feng Pan<sup>1</sup>, Gaoyang Zhao<sup>2\*</sup>, Yajie Ren<sup>1</sup>, Binbin Yao<sup>1</sup>, Hong Li<sup>7</sup>, Jing Lu<sup>3,4,5,6\*</sup>

<sup>1</sup> School of Physics and Telecommunication Engineering, Shaanxi Key Laboratory of Catalysis, Shaanxi University of Technology, Hanzhong 723001, P. R. China

<sup>2</sup> School of Materials Science and Engineering, Xi'an University of Technology, Xi'an, 710048, China

<sup>3</sup> State Key Laboratory of Mesoscopic Physics and Department of Physics, Peking University, Beijing 100871, P. R. China

<sup>4</sup> Collaborative Innovation Center of Quantum Matter, Beijing 100871, P. R. China

<sup>5</sup> Beijing Key Laboratory for Magnetoelectric Materials and Devices (BKL-MEMD), Beijing 100871, P. R. China

<sup>6</sup> Key Laboratory for the Physics and Chemistry of Nanodevices, Peking University, Beijing 100871, P. R. China

<sup>7</sup> College of Mechanical and Material Engineering, North China University of Technology, Beijing 100144, P. R. China

\*Corresponding author: [jinglu@pku.edu.cn](mailto:jinglu@pku.edu.cn), [guosophia@163.com](mailto:guosophia@163.com), [zhaogy@xaut.edu.cn](mailto:zhaogy@xaut.edu.cn)

**Table S1.** Benchmark of the ballistic performances upper limit of the sub-5 nm DG ML GeSe MOSFETs (zigzag- and armchair-directed) for HP applications against the ITRS requirements (2013 version). Here,  $L_g = 1\text{-}5$  nm,  $EOT = 0.41$  nm,  $V_{dd} = 0.64$  V,  $N_e (N_h) = 5 \times 10^{12}$  cm $^{-2}$ , and  $I_{off} = 0.1$   $\mu\text{A}/\mu\text{m}$  for HP applications.  $I_{on}$ : on-state current;  $SS$ : subthreshold swing;  $C_t$ : total capacitance;  $\tau$ : delay time; and PDP: power-delay product.

|          | $L_g$<br>(nm) | $V_{dd}$<br>(V) | UL<br>(nm) | SS (mV/dec)    |                | $I_{on}$ ( $\mu\text{A}/\mu\text{m}$ ) |                | $I_{on}/I_{off}$   |                    | $C_t$ (fF/ $\mu\text{m}$ ) |                | $\tau$ (ps)    |                | PDP (fJ/ $\mu\text{m}$ ) |                |       |
|----------|---------------|-----------------|------------|----------------|----------------|----------------------------------------|----------------|--------------------|--------------------|----------------------------|----------------|----------------|----------------|--------------------------|----------------|-------|
| ITRS HP  | 5.1           | 0.64            | 0          | —              |                | 900                                    |                | $9.00 \times 10^3$ |                    | 0.600                      |                | 0.423          |                | 0.24                     |                |       |
|          |               |                 |            | <i>n</i> -type | <i>p</i> -type | <i>n</i> -type                         | <i>p</i> -type | <i>n</i> -type     | <i>p</i> -type     | <i>n</i> -type             | <i>p</i> -type | <i>n</i> -type | <i>p</i> -type | <i>n</i> -type           | <i>p</i> -type |       |
| Armchair | 1             | 0.64            | 0          | 170            | 200            | 117                                    | 11             | $1.17 \times 10^3$ | $1.1 \times 10^2$  | 0.060                      | 0.063          | 0.330          | 3.650          | 0.025                    | 0.026          |       |
|          |               |                 | 2          | 150            | 190            | 236                                    | 67             | $2.36 \times 10^3$ | $6.7 \times 10^2$  | 0.064                      | 0.063          | 0.173          | 0.599          | 0.026                    | 0.026          |       |
|          |               |                 | 4          | 140            | 160            | 400                                    | 219            | $4 \times 10^3$    | $2.19 \times 10^3$ | 0.057                      | 0.063          | 0.091          | 0.183          | 0.023                    | 0.026          |       |
|          | 2             | 0.64            | 2          | 0              | 150            | 160                                    | 404            | 198                | $4.04 \times 10^3$ | $1.98 \times 10^3$         | 0.110          | 0.119          | 0.174          | 0.383                    | 0.045          | 0.049 |
|          |               |                 |            | 2              | 130            | 140                                    | 518            | 332                | $5.18 \times 10^3$ | $3.32 \times 10^3$         | 0.100          | 0.104          | 0.124          | 0.201                    | 0.041          | 0.043 |
|          |               |                 |            | 4              | 100            | 120                                    | 481            | 325                | $4.81 \times 10^3$ | $3.25 \times 10^3$         | 0.081          | 0.083          | 0.107          | 0.164                    | 0.033          | 0.034 |
|          | 3             | 0.64            | 2          | 0              | 120            | 130                                    | 433            | 289                | $4.33 \times 10^3$ | $2.89 \times 10^3$         | 0.129          | 0.153          | 0.191          | 0.339                    | 0.053          | 0.063 |
|          |               |                 |            | 2              | 100            | 110                                    | 461            | 328                | $4.61 \times 10^3$ | $3.28 \times 10^3$         | 0.104          | 0.106          | 0.144          | 0.207                    | 0.042          | 0.043 |
|          |               |                 |            | 4              | 90             | 100                                    | 492            | 307                | $4.92 \times 10^3$ | $3.07 \times 10^3$         | 0.105          | 0.117          | 0.137          | 0.244                    | 0.043          | 0.048 |
|          | 4             | 0.64            | 2          | 0              | 100            | 110                                    | 475            | 312                | $4.75 \times 10^3$ | $3.12 \times 10^3$         | 0.169          | 0.174          | 0.227          | 0.358                    | 0.069          | 0.071 |
|          |               |                 |            | 2              | 80             | 90                                     | 444            | 301                | $4.44 \times 10^3$ | $3.01 \times 10^3$         | 0.148          | 0.154          | 0.214          | 0.328                    | 0.061          | 0.063 |
|          |               |                 |            | 4              | 70             | 80                                     | 494            | 326                | $4.94 \times 10^3$ | $3.26 \times 10^3$         | 0.136          | 0.129          | 0.177          | 0.253                    | 0.056          | 0.053 |
| 5        | 0.64          | 2               | 0          | 80             | 100            | 441                                    | 309            | $4.41 \times 10^3$ | $3.09 \times 10^2$ | 0.247                      | 0.201          | 0.358          | 0.417          | 0.101                    | 0.083          |       |
|          |               |                 | 2          | 60             | 90             | 442                                    | 318            | $4.42 \times 10^3$ | $3.18 \times 10^3$ | 0.202                      | 0.214          | 0.292          | 0.430          | 0.083                    | 0.087          |       |
|          |               |                 | 4          | 60             | 70             | 483                                    | 328            | $4.83 \times 10^3$ | $3.28 \times 10^2$ | 0.179                      | 0.261          | 0.237          | 0.508          | 0.073                    | 0.107          |       |
| Zigzag   | 1             | 0.64            | 0          | 140            | 130            | 261                                    | 21             | $2.61 \times 10^3$ | $2.1 \times 10^2$  | 0.073                      | 0.069          | 0.180          | 2.095          | 0.030                    | 0.028          |       |
|          |               |                 | 2          | 140            | 120            | 288                                    | 476            | $2.88 \times 10^3$ | $4.76 \times 10^3$ | 0.071                      | 0.068          | 0.158          | 0.091          | 0.029                    | 0.028          |       |
|          |               |                 | 4          | 130            | 120            | 308                                    | 1238           | $3.08 \times 10^3$ | $1.24 \times 10^4$ | 0.064                      | 0.060          | 0.133          | 0.031          | 0.026                    | 0.024          |       |
|          | 2             | 0.64            | 2          | 0              | 120            | 110                                    | 279            | 1173               | $2.79 \times 10^3$ | $1.17 \times 10^4$         | 0.097          | 0.094          | 0.222          | 0.051                    | 0.040          | 0.038 |
|          |               |                 |            | 2              | 110            | 90                                     | 281            | 1605               | $2.81 \times 10^3$ | $1.61 \times 10^4$         | 0.088          | 0.089          | 0.200          | 0.035                    | 0.036          | 0.036 |
|          |               |                 |            | 4              | 100            | 90                                     | 298            | 1639               | $2.98 \times 10^3$ | $1.64 \times 10^4$         | 0.070          | 0.080          | 0.150          | 0.031                    | 0.029          | 0.033 |
|          | 3             | 0.64            | 2          | 0              | 100            | 80                                     | 266            | 1640               | $2.66 \times 10^3$ | $1.64 \times 10^4$         | 0.142          | 0.133          | 0.342          | 0.052                    | 0.058          | 0.054 |
|          |               |                 |            | 2              | 90             | 80                                     | 274            | 1651               | $2.74 \times 10^3$ | $1.65 \times 10^4$         | 0.118          | 0.121          | 0.276          | 0.047                    | 0.048          | 0.049 |
|          |               |                 |            | 4              | 80             | 60                                     | 295            | 1693               | $2.95 \times 10^3$ | $1.69 \times 10^4$         | 0.115          | 0.110          | 0.249          | 0.042                    | 0.047          | 0.045 |
|          | 4             | 0.64            | 2          | 0              | 80             | 80                                     | 267            | 1655               | $2.67 \times 10^3$ | $1.66 \times 10^4$         | 0.146          | 0.151          | 0.351          | 0.058                    | 0.060          | 0.062 |
|          |               |                 |            | 2              | 80             | 80                                     | 401            | 1673               | $4.01 \times 10^3$ | $1.67 \times 10^4$         | 0.144          | 0.143          | 0.230          | 0.055                    | 0.059          | 0.059 |
|          |               |                 |            | 4              | 70             | 60                                     | 296            | 1703               | $2.96 \times 10^3$ | $1.70 \times 10^4$         | 0.122          | 0.144          | 0.263          | 0.054                    | 0.050          | 0.059 |
| 5        | 0.64          | 2               | 0          | 80             | 80             | 258                                    | 1655           | $2.58 \times 10^3$ | $1.66 \times 10^4$ | 0.225                      | 0.274          | 0.559          | 0.106          | 0.092                    | 0.112          |       |
|          |               |                 | 2          | 80             | 60             | 266                                    | 1684           | $2.66 \times 10^3$ | $1.68 \times 10^4$ | 0.166                      | 0.296          | 0.399          | 0.113          | 0.068                    | 0.121          |       |
|          |               |                 | 4          | 60             | 60             | 302                                    | 1625           | $3.02 \times 10^3$ | $1.66 \times 10^4$ | 0.135                      | 0.175          | 0.287          | 0.069          | 0.055                    | 0.072          |       |

**Table S2.** Benchmark of the ballistic performances upper limit of the sub-5 nm DG ML GeSe MOSFETs (zigzag- and armchair-directed) for LP applications against the ITRS requirements (2013 version). Here,  $L_g = 1\text{-}5$  nm,  $EOT = 0.49$  nm,  $V_{dd} = 0.64$  V,  $N_e (N_h) = 5 \times 10^{12}$  cm $^{-2}$ , and  $I_{off} = 2 \times 10^{-5}$   $\mu\text{A}/\mu\text{m}$  for LP applications.  $I_{on}$ : on-state current;  $SS$ : subthreshold swing;  $C_i$ : total capacitance;  $\tau$ : delay time; and PDP: power-delay product.

|          | $L_g$<br>(nm) | $V_{dd}$<br>(V) | UL<br>(nm) | SS (mV/dec) |        | $I_{on}$ ( $\mu\text{A}/\mu\text{m}$ ) |        | $I_{on}/I_{off}$   |        | $C_i$ (fF/ $\mu\text{m}$ ) |        | $\tau$ (ps) |        | PDP (fJ/ $\mu\text{m}$ ) |        |
|----------|---------------|-----------------|------------|-------------|--------|----------------------------------------|--------|--------------------|--------|----------------------------|--------|-------------|--------|--------------------------|--------|
| ITRS LP  | 5.1           | 0.64            | 0          | —           | —      | 295                                    | —      | $5.9 \times 10^6$  | —      | 0.69                       | —      | 1.493       | —      | 0.28                     |        |
| Type     |               |                 |            | n-type      | p-type | n-type                                 | p-type | n-type             | p-type | n-type                     | p-type | n-type      | p-type | n-type                   | p-type |
| Armchair | 5             | 0.64            | 0          | —           | —      | —                                      | —      | —                  | —      | 0.247                      | 0.201  | —           | —      | 0.101                    | —      |
|          |               |                 | 2          | 270.0       | —      | 0.490                                  | —      | $9.8 \times 10^3$  | —      | 0.202                      | 0.214  | 263.84      | —      | 0.083                    | —      |
|          |               |                 | 4          | 160.0       | —      | 84                                     | —      | $1.68 \times 10^6$ | —      | 0.179                      | 0.261  | 1.36        | —      | 0.073                    | —      |
| Zigzag   | 3             | 0.64            | 0          | —           | —      | —                                      | —      | —                  | —      | 0.142                      | 0.133  | —           | —      | 0.058                    | —      |
|          |               |                 | 2          | 210.0       | —      | 3.1                                    | —      | $6.2 \times 10^4$  | —      | 0.118                      | 0.121  | 24.36       | —      | 0.048                    | —      |
|          |               |                 | 4          | 240.0       | —      | 6.7                                    | —      | $1.34 \times 10^5$ | —      | 0.115                      | 0.110  | 10.99       | —      | 0.047                    | —      |
|          | 4             | 0.64            | 0          | 220.0       | —      | 5.4                                    | —      | $1.08 \times 10^5$ | —      | 0.146                      | 0.151  | 17.30       | —      | 0.060                    | —      |
|          |               |                 | 2          | 160.0       | —      | 97                                     | —      | $1.94 \times 10^6$ | —      | 0.144                      | 0.143  | 0.95        | —      | 0.059                    | —      |
|          |               |                 | 4          | 130.0       | —      | 161                                    | —      | $3.22 \times 10^6$ | —      | 0.122                      | 0.144  | 0.48        | —      | 0.050                    | —      |
|          | 5             | 0.64            | 0          | 160.0       | —      | 100                                    | —      | $2.0 \times 10^6$  | —      | 0.225                      | 0.274  | 1.44        | —      | 0.092                    | —      |
|          |               |                 | 2          | 130.0       | —      | 245                                    | —      | $4.9 \times 10^6$  | —      | 0.166                      | 0.296  | 0.43        | —      | 0.068                    | —      |
|          |               |                 | 4          | 90.0        | —      | 274                                    | —      | $5.48 \times 10^6$ | —      | 0.135                      | 0.175  | 0.32        | —      | 0.055                    | —      |

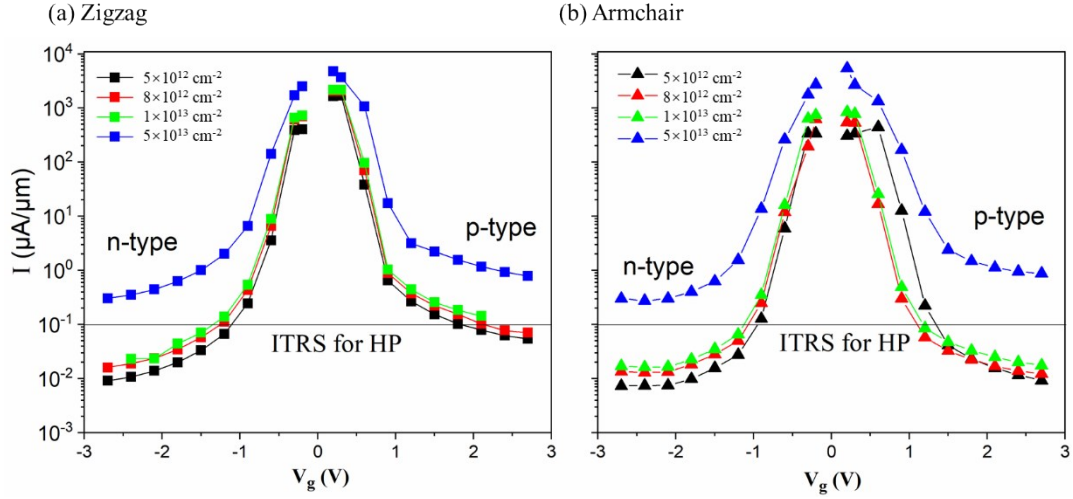

**Figure S1.** Transfer characteristics of the *n*- and *p*-type 5 nm gate-length DG ML GeSe MOSFETs for different source and drain doping concentrations of electron/hole ( $N_e$  ( $N_h$ )) along the zigzag (a) and armchair (b) directions.

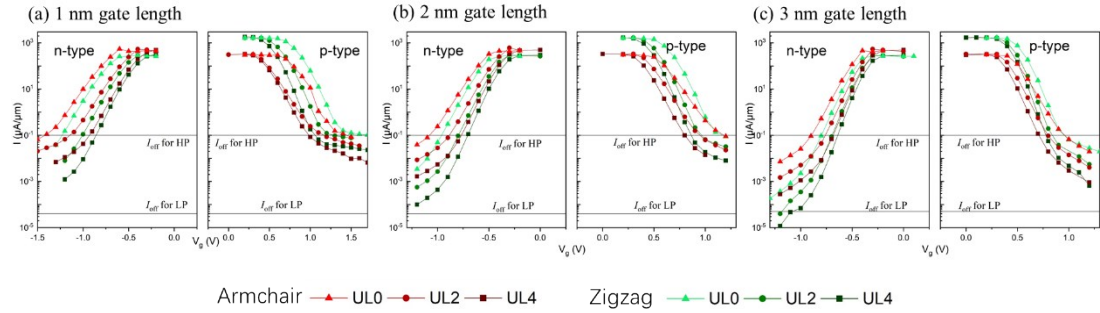

**Figure S2.** Transfer characteristics of the *n*- and *p*-type 1-3 nm gate-length DG ML GeSe MOSFETs with different underlaps along the armchair (red lines) and zigzag (green lines) directions, respectively. The electron (hole) concentration of the source and drain is  $N_e$  ( $N_h$ ) =  $5 \times 10^{12} \text{ cm}^{-2}$ .

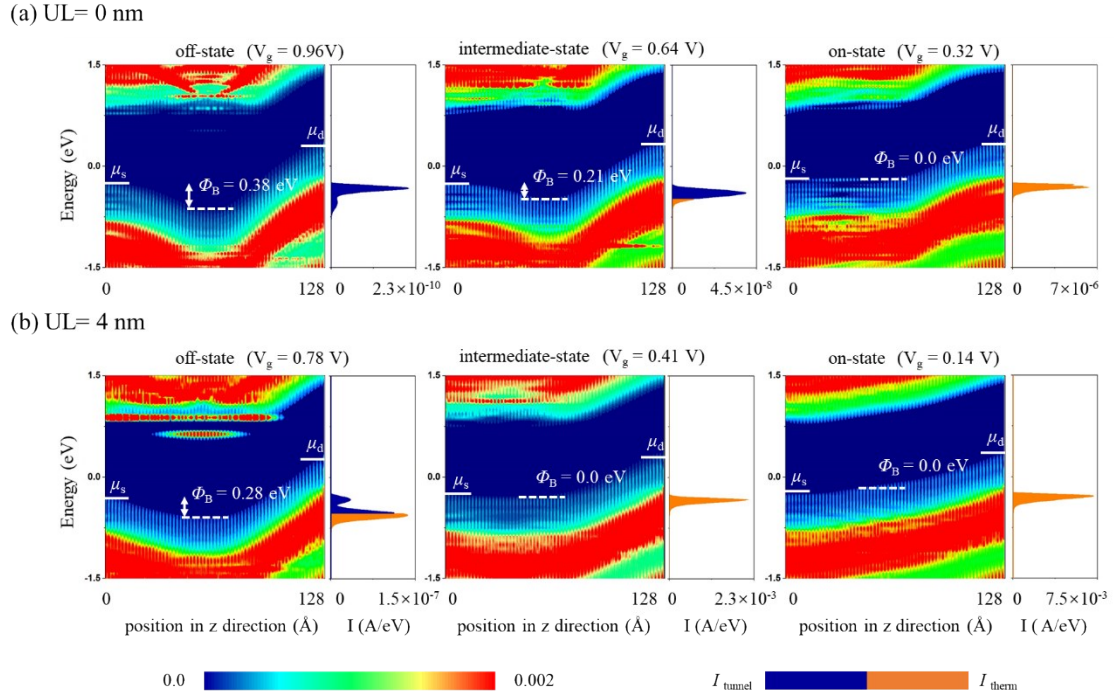

**Figure S3.** Local density of states (LDOS) (left panel) and the spectral current (right panel) for the *p*-type 3 nm gate-length DG ML GeSe MOSFETs (zigzag directed) with UL = 0 (a) / UL = 4 (b) under  $V_b = 0.64$  V at different  $V_g$ , respectively.  $\mu_s$  and  $\mu_d$  are the electrochemical potential of the source and drain, respectively.  $\Phi_B$  is the effective barrier height.

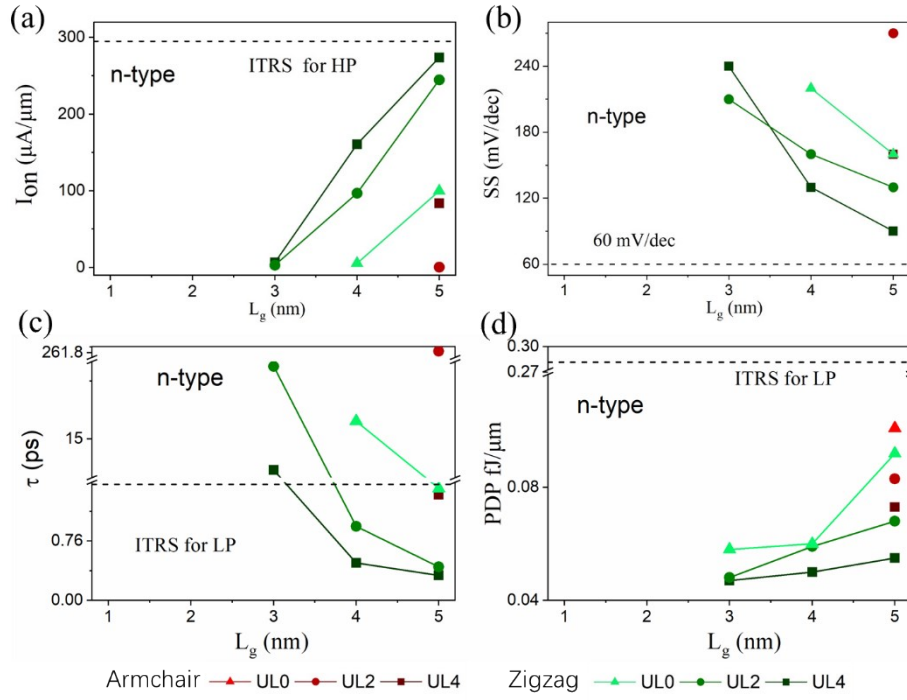

**Figure S4.** On-state current (a), subthreshold swing (b), intrinsic delay time ( $\tau$ ) (c), and power-delay product (PDP) (d) of the sub-5 nm *n*-type DG ML GeSe MOSFETs as a function of the  $L_g$ . The set of red and green lines indicate the armchair and zigzag directions, respectively.
